# Supplementary material for: Evolving the Era of 5D Ultrasound? A Systematic Literature Review on the Applications for Artificial Intelligence Ultrasound Imaging in Obstetrics and Gynecology
Source: MDPI journal article supplement (doi:10.3390/jcm12216833), 2023-10-29
Supplement: s1 [file s1]

Table S1: Overview of included literature on artificial intelligence applications in ultrasound for the subspecialty of obstetrics. US: Ultrasound.

| Authors                          | Year | Titel                                                                                                                                                      | Study design                 | Type of US | Analyzed images/cases             | Field of application   |
|----------------------------------|------|------------------------------------------------------------------------------------------------------------------------------------------------------------|------------------------------|------------|-----------------------------------|------------------------|
| <b>Alansary et al.</b>           | 2019 | Evaluating reinforcement learning agents for anatomical landmark detection.                                                                                | Retrospective                | 2D         | 72 images                         | Fetal neurosonography  |
| <b>Alsharid et al.</b>           | 2022 | Gaze-assisted automatic captioning of fetal ultrasound videos using three-way multi-modal deep neural networks.                                            | Retrospective                | 2D videos  | 10 videos                         | Workflow               |
| <b>Alzubaidi et al.</b>          | 2022 | Ensemble Transfer Learning for Fetal Head Analysis: From Segmentation to Gestational Age and Weight Prediction.                                            | Retrospective                | 2D         | 1,334 images from 551 women       | Gestational age        |
| <b>Ambroise Grandjean et al.</b> | 2018 | Artificial intelligence assistance for fetal head biometry: Assessment of automated measurement software.                                                  | Prospective, cross-sectional | 2D/3D      | 30 patients                       | Fetal biometry         |
| <b>Andreasen et al.</b>          | 2023 | Multi-centre deep learning for placenta segmentation in obstetric ultrasound with multi-observer and cross-country generalization.                         | Prospective, multi-center    | 2D         | 7,500 images                      | Placenta               |
| <b>Arnaout et al.</b>            | 2021 | An ensemble of neural networks provides expert-level prenatal detection of complex congenital heart disease.                                               | Retrospective, multi-center  | 2D         | 107,823 images from 1,326 cases   | Fetal echocardiography |
| <b>Arroyo et al.</b>             | 2022 | No sonographer, no radiologist: New system for automatic prenatal detection of fetal biometry, fetal presentation, and placental location.                 | Retrospective                | 2D         | 58 women                          | Fetal biometry         |
| <b>Asadpour et al.</b>           | 2023 | Automated placental abruption identification using semantic segmentation, quantitative features, SVM, ensemble and multi-path CNN.                         | Retrospective                | 2D         | 645 images                        | Placenta               |
| <b>Bai et al.</b>                | 2022 | A framework for computing angle of progression from transperineal ultrasound images for evaluating fetal head descent using a novel double branch network. | Retrospective                | 2D         | 4,013 images                      | Intrapartum sonography |
| <b>Baumgartner et al.</b>        | 2017 | SonoNet: Real-Time Detection and Localisation of Fetal Standard Scan Planes in Freehand Ultrasound.                                                        | Retrospective                | 2D videos  | 33,599 images, 2,638 videos       | Fetal biometry         |
| <b>Baykal et al.</b>             | 1994 | Interpretation of Doppler blood flow velocity waveforms using neural networks.                                                                             | Prospective                  | Doppler    | 600 datasets from 199 pregnancies | Placenta               |
| <b>Beksaç et al.</b>             | 1996 | An intelligent diagnostic system for the assessment of gestational age based on ultrasonic fetal head measurements.                                        | Retrospective                | 2D         | 613 images from 143 fetuses       | Gestational age        |
| <b>Beksaç et al.</b>             | 1996 | A computerized diagnostic system for the interpretation of umbilical artery blood flow velocity waveforms.                                                 | Prospective                  | Doppler    | 1,090 from 194 pregnancies        | Placenta               |
| <b>Beksaç et al.</b>             | 1996 | An automated intelligent diagnostic system for the interpretation of umbilical artery Doppler velocimetry.                                                 | Prospective                  | Doppler    | 668 images from 254 women         | Placenta               |
| <b>Bonet-Carne et al.</b>        | 2015 | Quantitative ultrasound texture analysis of fetal lungs to predict neonatal respiratory morbidity.                                                         | Prospective                  | 2D images  | 900 images                        | Fetal lung maturation  |

|                              |      |                                                                                                                                                                  |               |                   |                                   |                        |
|------------------------------|------|------------------------------------------------------------------------------------------------------------------------------------------------------------------|---------------|-------------------|-----------------------------------|------------------------|
| <b>Burgos-Artizzu et al.</b> | 2020 | Evaluation of deep convolutional neural networks for automatic classification of common maternal fetal ultrasound planes.                                        | Prospective   | 2D                | 12,400 images from 1,792 patients | Fetal biometry         |
| <b>Burgos-Artizzu et al.</b> | 2021 | Analysis of maturation features in fetal brain ultrasound via artificial intelligence for the estimation of gestational age.                                     | Prospective   | 2D                | 8,580 images from 2,034 patients  | Fetal neurosonography  |
| <b>Carneiro et al.</b>       | 2007 | Automatic fetal measurements in ultrasound using constrained probabilistic boosting tree.                                                                        | Retrospective | 2D                | 3,887 images                      | Fetal biometry         |
| <b>Carneiro et al.</b>       | 2008 | Detection and measurement of fetal anatomies from ultrasound images using a constrained probabilistic boosting tree.                                             | Retrospective | 2D                | 4,759 images                      | Fetal biometry         |
| <b>Cengizler et al.</b>      | 2020 | A Nature-Inspired Search Space Reduction Technique for Spine Identification on Ultrasound Samples of Spina Bifida Cases.                                         | Retrospective | 2D                | 14 patients                       | Fetal malformations    |
| <b>Chen et al.</b>           | 2017 | Ultrasound Standard Plane Detection Using a Composite Neural Network Framework.                                                                                  | Retrospective | 2D videos         | 50,634 images from 1,231 videos   | Fetal biometry         |
| <b>Chen et al.</b>           | 2015 | Standard Plane Localization in Fetal Ultrasound via Domain Transferred Deep Neural Networks.                                                                     | Retrospective | 2D videos         | 20,660 images from 519 videos     | Fetal biometry         |
| <b>Chen et al.</b>           | 2020 | A preliminary study to quantitatively evaluate the development of maturation degree for fetal lung based on transfer learning deep model from ultrasound images. | Retrospective | 2D                | 332 patients                      | Fetal lung maturation  |
| <b>Cho et al.</b>            | 2021 | Automated ultrasound assessment of amniotic fluid index using deep learning.                                                                                     | Retrospective | 2D                | 435 images from 255 patients      | Miscellaneous          |
| <b>Compagnon e et al.</b>    | 2022 | Artificial intelligence enhanced ultrasound (AI-US) in a severe obese parturient: a case report.                                                                 | Case Report   | 2D                | 1 case                            | Miscellaneous          |
| <b>Dan et al.</b>            | 2023 | DeepGA for automatically estimating fetal gestational age through ultrasound imaging.                                                                            | Retrospective | 2D                | 10,413 images from 7,113 subjects | Gestational age        |
| <b>Deng et al.</b>           | 2012 | A hierarchical model for automatic nuchal translucency detection from ultrasound images.                                                                         | Retrospective | 2D                | 690 images                        | Fetal malformations    |
| <b>Di Vece et al.</b>        | 2022 | Deep learning-based plane pose regression in obstetric ultrasound.                                                                                               | Retrospective | 2D/3D             | 6 volumes from 1 phantom          | Fetal neurosonography  |
| <b>Dong et al.</b>           | 2020 | A Generic Quality Control Framework for Fetal Ultrasound Cardiac Four-Chamber Planes.                                                                            | Retrospective | 2D                | 7,032 images                      | Fetal echocardiography |
| <b>Dozen et al.</b>          | 2020 | Image Segmentation of the Ventricular Septum in Fetal Cardiac Ultrasound Videos Based on Deep Learning Using Time-Series Information.                            | Prospective   | 2D videos         | 421 videos from 211 women         | Fetal echocardiography |
| <b>Drukker et al.</b>        | 2021 | Transforming obstetric ultrasound into data science using eye tracking, voice recording, transducer motion and ultrasound video.                                 | Prospective   | 2D/3D, Doppler    | 1,158,782 videos from 341 videos  | Workflow               |
| <b>Drukker et al.</b>        | 2022 | Clinical workflow of sonographers performing fetal anomaly ultrasound scans: deep-learning-based analysis.                                                       | Prospective   | 2D/3D/4D, Doppler | 496 scans                         | Workflow               |

|                        |      |                                                                                                                                                                                        |                           |                          |                                |                        |
|------------------------|------|----------------------------------------------------------------------------------------------------------------------------------------------------------------------------------------|---------------------------|--------------------------|--------------------------------|------------------------|
| <b>Du et al.</b>       | 2021 | Application of ultrasound-based radiomics technology in fetal-lung-texture analysis in pregnancies complicated by gestational diabetes and/or pre-eclampsia.                           | Retrospective             | 2D                       | 430 images from 548 women      | Fetal lung maturation  |
| <b>Du et al.</b>       | 2022 | Ultrasound-based radiomics technology in fetal lung texture analysis prediction of neonatal respiratory morbidity.                                                                     | Retrospective             | 2D images                | 295 images                     | Fetal lung maturation  |
| <b>Emery et al.</b>    | 2007 | Computer-assisted navigation applied to fetal cardiac intervention.                                                                                                                    | Prospective               | 2D/3D                    | 10 pregnant sheep              | Fetal echocardiography |
| <b>Gembicki et al.</b> | 2020 | Semiautomatic Fetal Intelligent Navigation Echocardiography Has the Potential to Aid Cardiac Evaluations Even in Less Experienced Hands.                                               | Prospective               | 2D/4D                    | 30 fetuses                     | Fetal echocardiography |
| <b>Ghi et al.</b>      | 2022 | Novel artificial intelligence approach for automatic differentiation of fetal occiput anterior and non-occiput anterior positions during labor.                                        | Prospective, multi-center | 2D                       | 1,219 images from 1,219 women  | Intrapartum sonography |
| <b>Gofer et al.</b>    | 2022 | Machine Learning Algorithms for Classification of First-Trimester Fetal Brain Ultrasound Images.                                                                                       | Retrospective             | 2D                       | 80 images from 56 fetuses      | Fetal neurosonography  |
| <b>Gomes et al.</b>    | 2022 | A mobile-optimized artificial intelligence system for gestational age and fetal malpresentation assessment.                                                                            | Retrospective             | 2D videos                | 521 patients                   | Gestational age        |
| <b>Gong et al.</b>     | 2020 | Fetal Congenital Heart Disease Echocardiogram Screening Based on DGACNN: Adversarial One-Class Classification Combined with Video Transfer Learning.                                   | Retrospective             | 2D                       | not specified                  | Fetal echocardiography |
| <b>Gupta et al.</b>    | 2011 | Segmentation of 2D fetal ultrasound images by exploiting context information using conditional random fields.                                                                          | Retrospective             | 2D                       | 2 images                       | Image quality          |
| <b>Gupta et al.</b>    | 2022 | Ultrasound placental image texture analysis using artificial intelligence to predict hypertension in pregnancy.                                                                        | Prospective               | 2D, color Doppler        | 429 cases                      | Placenta               |
| <b>Han et al.</b>      | 2022 | Adoption of Compound Echocardiography under Artificial Intelligence Algorithm in Fetal Congenial Heart Disease Screening during Gestation.                                             | Retrospective             | 2D, color Doppler        | 9,654 fetuses                  | Fetal echocardiography |
| <b>He et al.</b>       | 2022 | B-Ultrasound Image Analysis of Intrauterine Pregnancy Residues after Mid-Term Pregnancy Based on Smart Medical Big Data.                                                               | Retrospective             | 2D                       | 106 patients                   | Maternal factors       |
| <b>Herling et al.</b>  | 2021 | Automated quantitative evaluation of fetal atrioventricular annular plane systolic excursion.                                                                                          | Retrospective             | 2D videos, color Doppler | 343 fetuses                    | Fetal echocardiography |
| <b>Hesse et al.</b>    | 2022 | Subcortical segmentation of the fetal brain in 3D ultrasound using deep learning.                                                                                                      | Retrospective             | 3D                       | 537 images                     | Fetal neurosonography  |
| <b>Hu et al.</b>       | 2019 | Automated Placenta Segmentation with a Convolutional Neural Network Weighted by Acoustic Shadow Detection.                                                                             | Prospective               | 2D                       | 1,364 images from 247 patients | Placenta               |
| <b>Huang et al.</b>    | 2018 | VP-Nets : Efficient automatic localization of key brain structures in 3D fetal neurosonography.                                                                                        | Retrospective             | 3D                       | 285 scans                      | Fetal neurosonography  |
| <b>Jang et al.</b>     | 2018 | Automatic Estimation of Fetal Abdominal Circumference From Ultrasound Images.                                                                                                          | Retrospective             | 2D                       | 13,261 images from 88 cases    | Fetal biometry         |
| <b>Kaplan et al.</b>   | 2022 | PFP-LHCINCA: Pyramidal Fixed-Size Patch-Based Feature Extraction and Chi-Square Iterative Neighborhood Component Analysis for Automated Fetal Sex Classification on Ultrasound Images. | Retrospective             | 2D                       | 671 women                      | Miscellaneous          |
| <b>Kim et al.</b>      | 2018 | Machine-learning-based automatic identification of fetal abdominal circumference from ultrasound images.                                                                               | Retrospective             | 2D                       | 174 images                     | Fetal biometry         |

|                      |      |                                                                                                                                                                                        |               |                  |                                                                        |                        |
|----------------------|------|----------------------------------------------------------------------------------------------------------------------------------------------------------------------------------------|---------------|------------------|------------------------------------------------------------------------|------------------------|
| <b>Lee et al.</b>    | 2023 | Development of a Machine Learning Model for Sonographic Assessment of Gestational Age.                                                                                                 | Retrospective | 2D images/videos | 3,842 patients                                                         | Gestational age        |
| <b>Lee et al.</b>    | 2023 | Machine learning for accurate estimation of fetal gestational age based on ultrasound images.                                                                                          | Retrospective | 2D images        | 293,811 images from 4233 pregnancies                                   | Gestational age        |
| <b>Lei et al.</b>    | 2015 | Discriminative Learning for Automatic Staging of Placental Maturity via Multi-layer Fisher Vector.                                                                                     | Retrospective | 2D               | 443 images                                                             | Placenta               |
| <b>Li et al.</b>     | 2018 | Automatic Fetal Head Circumference Measurement in Ultrasound Using Random Forest and Fast Ellipse Fitting.                                                                             | Retrospective | 2D               | 669 images                                                             | Fetal biometry         |
| <b>Li et al.</b>     | 2020 | Automated measurement network for accurate segmentation and parameter modification in fetal head ultrasound images.                                                                    | Retrospective | 2D               | 1,334 images from 551 women                                            | Fetal biometry         |
| <b>Li et al.</b>     | 2014 | Automatic staging of placental maturity based on dense descriptor.                                                                                                                     | Retrospective | 2D               | 311 images                                                             | Placenta               |
| <b>Lin et al.</b>    | 2022 | How much can AI see in early pregnancy: A multi-center study of fetus head characterization in week 10-14 in ultrasound using deep learning.                                           | Retrospective | 2D               | 1,528 images from 1,519 women                                          | Fetal neurosonography  |
| <b>Lin et al.</b>    | 2019 | Multi-task learning for quality assessment of fetal head ultrasound images.                                                                                                            | Retrospective | 2D               | 1,771 images                                                           | Fetal neurosonography  |
| <b>Lin et al.</b>    | 2022 | Use of real-time artificial intelligence in detection of abnormal image patterns in standard sonographic reference planes in screening for fetal intracranial malformations.           | Retrospective | 2D images/videos | 43,890 images from 16,297 pregnancies, 169 videos from 166 pregnancies | Fetal neurosonography  |
| <b>Liu et al.</b>    | 2021 | Doppler Ultrasound Imaging Combined with Fetal Heart Detection in Predicting Fetal Distress in Pregnancy-Induced Hypertension under the Guidance of Artificial Intelligence Algorithm. | Retrospective | Doppler          | 120 women                                                              | Maternal factors       |
| <b>Looney et al.</b> | 2021 | Fully Automated 3-D Ultrasound Segmentation of the Placenta, Amniotic Fluid, and Fetus for Early Pregnancy Assessment.                                                                 | Retrospective | 3D               | 2,393 volumes                                                          | Early pregnancy        |
| <b>Looney et al.</b> | 2018 | Fully automated, real-time 3D ultrasound segmentation to estimate first trimester placental volume using deep learning.                                                                | Retrospective | 3D               | 2,393 patients                                                         | Placenta               |
| <b>Lu et al.</b>     | 2022 | Multitask Deep Neural Network for the Fully Automatic Measurement of the Angle of Progression.                                                                                         | Retrospective | 2D               | 1,964 images from 104 women                                            | Intrapartum sonography |
| <b>Luo et al.</b>    | 2021 | A Prenatal Ultrasound Scanning Approach: One-Touch Technique in Second and Third Trimesters.                                                                                           | Prospective   | 2D               | 1,005 women                                                            | Fetal biometry         |
| <b>Ma et al.</b>     | 2020 | Diagnostic performance of fetal intelligent navigation echocardiography (FINE) in fetuses with double-outlet right ventricle (DORV).                                                   | Prospective   | 3D/4D            | 30 fetuses                                                             | Fetal echocardiography |
| <b>Maraci et al.</b> | 2017 | A framework for analysis of linear ultrasound videos to detect fetal presentation and heartbeat.                                                                                       | Retrospective | 2D videos        | 323 videos                                                             | Early Pregnancy        |
| <b>Maraci et al.</b> | 2020 | Toward point-of-care ultrasound estimation of fetal gestational age from the trans-cerebellar diameter using CNN-based ultrasound image analysis.                                      | Retrospective | 2D images        | 8,736 images                                                           | Gestational age        |

|                           |      |                                                                                                                                                              |                            |                  |                                   |                        |
|---------------------------|------|--------------------------------------------------------------------------------------------------------------------------------------------------------------|----------------------------|------------------|-----------------------------------|------------------------|
| <b>Matthew et al.</b>     | 2022 | Exploring a new paradigm for the fetal anomaly ultrasound scan: Artificial intelligence in real time.                                                        | Prospective                | 2D               | 23 women                          | Fetal malformations    |
| <b>Meenakshi et al.</b>   | 2019 | Segmentation and Boundary Detection of Fetal Kidney Images in Second and Third Trimesters Using Kernel-Based Fuzzy Clustering.                               | Retrospective              | 2D               | 50 images                         | Fetal malformations    |
| <b>Meng et al.</b>        | 2019 | Weakly Supervised Estimation of Shadow Confidence Maps in Fetal Ultrasound Imaging.                                                                          | Retrospective              | 2D               | 8,500 images from 2,694 patients  | Image quality          |
| <b>Miyagi et al.</b>      | 2022 | Artificial intelligence to understand fluctuation of fetal brain activity by recognizing facial expressions.                                                 | Retrospective              | 4D               | 37 videos from 33 patients        | Fetal face             |
| <b>Miyagi et al.</b>      | 2021 | Recognition of facial expression of fetuses by artificial intelligence (AI).                                                                                 | Retrospective              | 4D               | 147 images from 14 fetuses        | Fetal face             |
| <b>Namburete et al.</b>   | 2018 | Fully-automated alignment of 3D fetal brain ultrasound to a canonical reference space using multi-task learning.                                             | Retrospective              | 3D               | 739 volumes                       | Fetal neurosonography  |
| <b>Namburete et al.</b>   | 2015 | Learning-based prediction of gestational age from ultrasound images of the fetal brain.                                                                      | Retrospective              | 3D               | 634 cases                         | Gestational age        |
| <b>Ni et al.</b>          | 2014 | Standard plane localization in ultrasound by radial component model and selective search.                                                                    | Retrospective              | 2D videos        | 1,995 images, 223 videos          | Fetal biometry         |
| <b>Nurmaini et al.</b>    | 2021 | Deep Learning-Based Computer-Aided Fetal Echocardiography: Application to Heart Standard View Segmentation for Congenital Heart Defects Detection.           | Retrospective              | 2D               | 1,149 images from 100 women       | Fetal echocardiography |
| <b>Nurmaini et al.</b>    | 2022 | Deep Learning for Improving the Effectiveness of Routine Prenatal Screening for Major Congenital Heart Diseases.                                             | Retrospective              | 2D videos        | 1,184 videos from 76 women        | Fetal echocardiography |
| <b>Patra et al.</b>       | 2020 | Hierarchical Class Incremental Learning of Anatomical Structures in Fetal Echocardiography Videos.                                                           | Retrospective              | 2D videos        | not specified                     | Fetal echocardiography |
| <b>Pietrolucci et al.</b> | 2023 | Evaluation of an artificial intelligent algorithm (Heartassist™) to automatically assess the quality of second trimester cardiac views: a prospective study. | Prospective                | 2D               | 120 women                         | Fetal echocardiography |
| <b>Plotka et al.</b>      | 2022 | Deep learning fetal ultrasound video model match human observers in biometric measurements.                                                                  | Retrospective              | 2D images/videos | 700 videos                        | Fetal biometry         |
| <b>Pluym et al.</b>       | 2021 | Accuracy of automated three-dimensional ultrasound imaging technique for fetal head biometry.                                                                | Prospective, observational | 3D               | 143 women                         | Fetal biometry         |
| <b>Pokaprakarn et al.</b> | 2022 | AI Estimation of Gestational Age from Blind Ultrasound Sweeps in Low-Resource Settings.                                                                      | Prospective                | 2D images/videos | 4,695 patients                    | Gestational age        |
| <b>Pradipta et al.</b>    | 2022 | Machine learning model for umbilical cord classification using combination coiling index and texture feature based on 2-D Doppler ultrasound images.         | Retrospective              | 2D, Doppler      | 151 images                        | Placenta               |
| <b>Prieto et al.</b>      | 2021 | An automated framework for image classification and segmentation of fetal ultrasound images for gestational age estimation.                                  | Retrospective, prospective | 2D images        | 155,088 images from 8,843 studies | Gestational age        |

|                               |      |                                                                                                                                                                                   |               |                    |                                       |                        |
|-------------------------------|------|-----------------------------------------------------------------------------------------------------------------------------------------------------------------------------------|---------------|--------------------|---------------------------------------|------------------------|
| <b>Qi et al.</b>              | 2018 | Automatic Lacunae Localization in Placental Ultrasound Images via Layer Aggregation.                                                                                              | Retrospective | 2D                 | 3,440 images from 34 scans            | Placenta               |
| <b>Qi et al.</b>              | 2017 | Weakly Supervised Learning of Placental Ultrasound Images with Residual Networks.                                                                                                 | Retrospective | 2D                 | 10,808 images from 60 volumes         | Placenta               |
| <b>Qiao et al.</b>            | 2023 | A Pseudo-Siamese Feature Fusion Generative Adversarial Network for Synthesizing High-Quality Fetal Four-Chamber Views.                                                            | Retrospective | 2D                 | not specified                         | Fetal echocardiography |
| <b>Rahman et al.</b>          | 2023 | Demystifying evidential Dempster Shafer-based CNN architecture for fetal plane detection from 2D ultrasound images leveraging fuzzy-contrast enhancement and explainable AI.      | Retrospective | 2D                 | 12,400 images                         | Fetal biometry         |
| <b>Rueda et al.</b>           | 2015 | Feature-based fuzzy connectedness segmentation of ultrasound images with an object completion step.                                                                               | Retrospective | 2D                 | 81 images                             | Miscellaneous          |
| <b>Ryou et al.</b>            | 2019 | Automated 3D ultrasound image analysis for first trimester assessment of fetal health.                                                                                            | Retrospective | 3D                 | 65 volumes                            | Fetal malformations    |
| <b>Sahli et al.</b>           | 2019 | Supervised classification approach of biometric measures for automatic fetal defect screening in head ultrasound images.                                                          | Retrospective | 2D                 | 86 women                              | Fetal neurosonography  |
| <b>Sakai et al.</b>           | 2022 | Medical Professional Enhancement Using Explainable Artificial Intelligence in Fetal Cardiac Ultrasound Screening.                                                                 | Retrospective | 2D videos          | 334 videos from 160 cases             | Fetal echocardiography |
| <b>Scharf et al.</b>          | 2023 | How Automated Techniques Ease Functional Assessment of the Fetal Heart: Applicability of MPI+, $\hat{N}c$ for Direct Quantification of the Modified Myocardial Performance Index. | Retrospective | 2d videos, Doppler | 85 fetuses                            | Fetal echocardiography |
| <b>Schilpzand et al.</b>      | 2022 | Automatic Placenta Localization From Ultrasound Imaging in a Resource-Limited Setting Using a Predefined Ultrasound Acquisition Protocol and Deep Learning.                       | Prospective   | 2D                 | 280,6574 images                       | Placenta               |
| <b>Schwartz et al.</b>        | 2022 | Fully Automated Placental Volume Quantification From 3D Ultrasound for Prediction of Small-for-Gestational-Age Infants.                                                           | Retrospective | 2D/3D              | 124 images from 422 patients          | Placenta               |
| <b>Sciortino et al.</b>       | 2017 | Automatic detection and measurement of nuchal translucency.                                                                                                                       | Retrospective | 2D                 | 382 images from 12 patients           | Fetal malformations    |
| <b>Sendra-Balcells et al.</b> | 2023 | Generalisability of fetal ultrasound deep learning models to low-resource imaging settings in five African countries.                                                             | Prospective   | 2D                 | 12,454 images from 2925 patients      | Fetal biometry         |
| <b>Sharma et al.</b>          | 2021 | Multi-Modal Learning from Video, Eye Tracking, and Pupillometry for Operator Skill Characterization in Clinical Fetal Ultrasound.                                                 | Retrospective | 2D videos          | 2,309 videos from 370 scans           | Workflow               |
| <b>Sharma et al.</b>          | 2021 | Knowledge representation and learning of operator clinical workflow from full-length routine fetal ultrasound scan videos.                                                        | Prospective   | 2D/3D/4D, Doppler  | 341 videos                            | Workflow               |
| <b>Shozu et al.</b>           | 2020 | Model-Agnostic Method for Thoracic Wall Segmentation in Fetal Ultrasound Videos.                                                                                                  | Retrospective | 2D                 | 538 images, 280 videos from 256 cases | Fetal malformations    |
| <b>Skelton et al.</b>         | 2021 | Towards automated extraction of 2D standard fetal head planes from 3D ultrasound acquisitions: A clinical evaluation and quality assessment comparison.                           | Retrospective | 2D/3D              | 551 images from 91 scans              | Fetal neurosonography  |

|                                |      |                                                                                                                                                                                             |                           |                   |                                 |                        |
|--------------------------------|------|---------------------------------------------------------------------------------------------------------------------------------------------------------------------------------------------|---------------------------|-------------------|---------------------------------|------------------------|
| <b>Sreelakshmy et al.</b>      | 2022 | An Automated Deep Learning Model for the Cerebellum Segmentation from Fetal Brain Images.                                                                                                   | Retrospective             | 2D                | 740 images                      | Fetal neurosonography  |
| <b>Sridar et al.</b>           | 2019 | Decision Fusion-Based Fetal Ultrasound Image Plane Classification Using Convolutional Neural Networks.                                                                                      | Retrospective             | 2D                | 4,074 images                    | Fetal biometry         |
| <b>Sun et al.</b>              | 2022 | Model application to quantitatively evaluate placental features from ultrasound images with gestational diabetes.                                                                           | Prospective               | 2D, color Doppler | 718 images                      | Placenta               |
| <b>Sun et al.</b>              | 2023 | Multimodal fusion model for classifying placenta ultrasound imaging in pregnancies with hypertension disorders.                                                                             | Prospective               | 2D, color Doppler | 654 women                       | Placenta               |
| <b>Sur et al.</b>              | 2010 | A novel technique for the semi-automated measurement of embryo volume: an intraobserver reliability study.                                                                                  | Retrospective             | 2D/3D             | 72 women                        | Early pregnancy        |
| <b>Tang et al.</b>             | 2023 | The Two-Stage Ensemble Learning Model Based on Aggregated Facial Features in Screening for Fetal Genetic Diseases.                                                                          | Prospective               | 3D                | 932 images from 667 pregnancies | Fetal face             |
| <b>Torrents-Barrena et al.</b> | 2019 | TTTS-GPS: Patient-specific preoperative planning and simulation platform for twin-to-twin transfusion syndrome fetal surgery.                                                               | Retrospective             | 3D                | 60 volumes                      | Placenta               |
| <b>Torrents-Barrena et al.</b> | 2021 | Assessment of Radiomics and Deep Learning for the Segmentation of Fetal and Maternal Anatomy in Magnetic Resonance Imaging and Ultrasound.                                                  | Retrospective             | 3D                | not specified                   | Placenta               |
| <b>Tsai et al.</b>             | 2020 | Automatic Fetal Middle Sagittal Plane Detection in Ultrasound Using Generative Adversarial Network.                                                                                         | Prospective               | 3D                | 218 volumes                     | Fetal malformations    |
| <b>Van den Heuvel et al.</b>   | 2019 | Automated Fetal Head Detection and Circumference Estimation from Free-Hand Ultrasound Sweeps Using Deep Learning in Resource-Limited Countries.                                             | Prospective               | 2D                | 183 images                      | Fetal biometry         |
| <b>Veronese et al.</b>         | 2023 | Prenatal Diagnosis and Fetopsy Validation of Complete Atrioventricular Septal Defects Using the Fetal Intelligent Navigation Echocardiography Method.                                       | Prospective               | 2D/4D             | 4 fetuses                       | Fetal echocardiography |
| <b>Walker et al.</b>           | 2022 | Using deep-learning in fetal ultrasound analysis for diagnosis of cystic hygroma in the first trimester.                                                                                    | Retrospective             | 2D                | 289 images                      | Fetal malformations    |
| <b>Wang et al.</b>             | 2022 | Automated prediction of early spontaneous miscarriage based on the analyzing ultrasonographic gestational sac imaging by the convolutional neural network: a case-control and cohort study. | Retrospective/Prospective | 2D                | 2,468 images from 1,234 women   | Early pregnancy        |
| <b>Wang et al.</b>             | 2022 | Diagnosis of fetal total anomalous pulmonary venous connection based on the post-left atrium space ratio using artificial intelligence.                                                     | Retrospective             | 2D                | 319 fetuses                     | Fetal echocardiography |
| <b>Wang et al.</b>             | 2021 | Recognition of Fetal Facial Ultrasound Standard Plane Based on Texture Feature Fusion.                                                                                                      | Retrospective             | 2D                | 943 images                      | Fetal face             |
| <b>Wang et al.</b>             | 2022 | Value of Ultrasonic Image Features in Diagnosis of Perinatal Outcomes of Severe Preeclampsia on account of Deep Learning Algorithm.                                                         | Prospective               | Doppler           | 280 women                       | Maternal factors       |
| <b>Wang et al.</b>             | 2022 | Task model-specific operator skill assessment in routine fetal ultrasound scanning.                                                                                                         | Retrospective             | 2D videos         | 294 videos from 139 patients    | Workflow               |
| <b>Wu et al.</b>               | 2023 | Application of Artificial Intelligence in Anatomical Structure Recognition of Standard Section of Fetal Heart.                                                                              | Retrospective             | 2D                | 3,360 images                    | Fetal echocardiography |
| <b>Wu et al.</b>               | 2004 | A novel algorithm for computer-assisted measurement of cervical length from transvaginal ultrasound images.                                                                                 | Retrospective             | 2D                | 101 images from 17 patients     | Maternal factors       |

|                        |      |                                                                                                                                                                                            |                                    |                  |                                     |                        |
|------------------------|------|--------------------------------------------------------------------------------------------------------------------------------------------------------------------------------------------|------------------------------------|------------------|-------------------------------------|------------------------|
| <b>Wu et al.</b>       | 2017 | FUIQA: Fetal Ultrasound Image Quality Assessment With Deep Convolutional Networks.                                                                                                         | Retrospective                      | 2D               | 8,072 images from 492 videos        | Image quality          |
| <b>Xia et al.</b>      | 2021 | Establish a normal fetal lung gestational age grading model and explore the potential value of deep learning algorithms in fetal lung maturity evaluation.                                 | Retrospective                      | 2D               | 7,013 images from 1,023 pregnancies | Fetal lung maturation  |
| <b>Xie et al.</b>      | 2020 | Using deep-learning algorithms to classify fetal brain ultrasound images as normal or abnormal.                                                                                            | Retrospective                      | 2D/3D            | 29,419 images from 12,780 cases     | Fetal neurosonography  |
| <b>Xie et al.</b>      | 2020 | Computer-aided diagnosis for fetal brain ultrasound images using deep convolutional neural networks.                                                                                       | Retrospective                      | 2D images/videos | 29,748 women                        | Fetal neurosonography  |
| <b>Xu et al.</b>       | 2020 | Simulating realistic fetal neurosonography images with appearance and growth change using cycle-consistent adversarial networks and an evaluation.                                         | Retrospective                      | 2D               | not specified                       | Fetal neurosonography  |
| <b>Xu et al.</b>       | 2020 | DW-Net: A cascaded convolutional neural network for apical four-chamber view segmentation in fetal echocardiography.                                                                       | Retrospective                      | 2D               | 895 images                          | Fetal echocardiography |
| <b>Yang et al.</b>     | 2022 | A new approach to automatic measure fetal head circumference in ultrasound images using convolutional neural networks.                                                                     | Retrospective                      | 2D               | 1,334 images from 551 women         | Fetal biometry         |
| <b>Yang et al.</b>     | 2021 | Agent With Warm Start and Adaptive Dynamic Termination for Plane Localization in 3D Ultrasound.                                                                                            | Retrospective                      | 3D               | 1,635 volumes                       | Fetal biometry         |
| <b>Yang et al.</b>     | 2023 | Classification of normal and abnormal fetal heart ultrasound images and identification of ventricular septal defects based on deep learning.                                               | Retrospective                      | 2D               | not specified                       | Fetal echocardiography |
| <b>Yang et al.</b>     | 2022 | Deep Learning Algorithm-Based Ultrasound Image Information in Diagnosis and Treatment of Pernicious Placenta Previa.                                                                       | Prospective                        | Doppler          | 60 women                            | Placenta               |
| <b>Yang et al.</b>     | 2019 | Towards Automated Semantic Segmentation in Prenatal Volumetric Ultrasound.                                                                                                                 | Prospective                        | 3D               | 104 women                           | Fetal malformations    |
| <b>Yaqub et al.</b>    | 2017 | A Deep Learning Solution for Automatic Fetal Neurosonographic Diagnostic Plane Verification Using Clinical Standard Constraints.                                                           | Retrospective                      | 2D               | 19,838 images from 10,595 scans     | Fetal neurosonography  |
| <b>Yasrab et al.</b>   | 2023 | A Machine Learning Method for Automated Description and Workflow Analysis of First Trimester Ultrasound Scans.                                                                             | Prospective                        | 2D videos        | 250 videos                          | Workflow               |
| <b>Yasunari et al.</b> | 2023 | Fetal brain activity and the free energy principle.                                                                                                                                        | Retrospective                      | 4D               | ns                                  | Fetal face             |
| <b>Yeo et al.</b>      | 2013 | Fetal Intelligent Navigation Echocardiography (FINE): a novel method for rapid, simple, and automatic examination of the fetal heart.                                                      | Prospective                        | 4D               | 51 datasets                         | Fetal echocardiography |
| <b>Yeung et al.</b>    | 2021 | Learning to map 2D ultrasound images into 3D space with minimal human annotation.                                                                                                          | Retrospective                      | 2D/3D            | 195,000 images from 65 volumes      | Fetal neurosonography  |
| <b>Yin et al.</b>      | 2022 | Evaluation of Nursing Effect of Pelvic Floor Rehabilitation Training on Pelvic Organ Prolapse in Postpartum Pregnant Women under Ultrasound Imaging with Artificial Intelligence Algorithm | Prospective, randomized-controlled | 3D               | 60 patients                         | Image quality          |
| <b>Yu et al.</b>       | 2022 | A guiding approach of Ultrasound scan for accurately obtaining standard diagnostic planes of fetal brain malformation.                                                                     | Prospective                        | 2D/3D            | 3,200 images                        | Fetal neurosonography  |
| <b>Yu et al.</b>       | 2017 | Determination of Fetal Left Ventricular Volume Based on Two-Dimensional Echocardiography.                                                                                                  | Retrospective                      | 2D/3D            | 50 cases                            | Fetal echocardiography |



|                     |      |                                                                                                                                                   |               |    |                                |                     |
|---------------------|------|---------------------------------------------------------------------------------------------------------------------------------------------------|---------------|----|--------------------------------|---------------------|
| <b>Yu et al.</b>    | 2018 | A Deep Convolutional Neural Network-Based Framework for Automatic Fetal Facial Standard Plane Recognition.                                        | Retrospective | 2D | 7,267 images                   | Fetal face          |
| <b>Zeng et al.</b>  | 2021 | Fetal Ultrasound Image Segmentation for Automatic Head Circumference Biometry Using Deeply Supervised Attention-Gated V-Net.                      | Retrospective | 2D | 1,354 images from 551 patients | Fetal biometry      |
| <b>Zeng et al.</b>  | 2022 | Efficient fetal ultrasound image segmentation for automatic head circumference measurement using a lightweight deep convolutional neural network. | Retrospective | 2D | 1,334 images from 551 women    | Fetal biometry      |
| <b>Zhang et al.</b> | 2021 | Automatic quality assessment for 2D fetal sonographic standard plane based on multitask learning.                                                 | Retrospective | 2D | 4,101 images                   | Fetal biometry      |
| <b>Zhang et al.</b> | 2022 | Segmentation-Based vs. Regression-Based Biomarker Estimation: A Case Study of Fetus Head Circumference Assessment from Ultrasound Images.         | Retrospective | 2D | 1,334 images from 551 women    | Fetal biometry      |
| <b>Zhang et al.</b> | 2022 | Development and Validation of a Deep Learning Model to Screen for Trisomy 21 During the First Trimester From Nuchal Ultrasonographic Images.      | Retrospective | 2D | 822 women                      | Fetal malformations |
| <b>Zhao et al.</b>  | 2021 | Visual-Assisted Probe Movement Guidance for Obstetric Ultrasound Scanning using Landmark Retrieval.                                               | Prospective   | 3D | 535,775 images                 | Workflow            |
| <b>Zhu et al.</b>   | 2021 | Automatic measurement of fetal femur length in ultrasound images: a comparison of random forest regression model and SegNet.                      | Retrospective | 2D | 436 images                     | Fetal biometry      |

Table S2: Overview of included literature on artificial intelligence applications in ultrasound for the subspecialty of gynecology. US: Ultrasound.

| Authors                            | Year | Titel                                                                                                                                                                            | Study design              | Type of US        | Analyzed images/cases     | Field of application |
|------------------------------------|------|----------------------------------------------------------------------------------------------------------------------------------------------------------------------------------|---------------------------|-------------------|---------------------------|----------------------|
| <b>Al-Karawi et al.</b>            | 2021 | An Evaluation of the Effectiveness of Image-based Texture Features Extracted from Static B-mode Ultrasound Images in Distinguishing between Benign and Malignant Ovarian Masses. | Retrospective             | 2D                | 242 images                | Adnexal masses       |
| <b>Amor et al.</b>                 | 2009 | Gynecologic imaging reporting and data system: a new proposal for classifying adnexal masses on the basis of sonographic findings.                                               | Prospective               | 2D, color Doppler | 187 masses from 171 women | Adnexal masses       |
| <b>Aramendía-Vidaurreta et al.</b> | 2016 | Ultrasound Image Discrimination between Benign and Malignant Adnexal Masses Based on a Neural Network Approach.                                                                  | Retrospective             | 3D                | 145 women                 | Adnexal masses       |
| <b>Berg et al.</b>                 | 2023 | Toward AI-supported US Triage of Women with Palpable Breast Lumps in a Low-Resource Setting.                                                                                     | Prospective, multi-center | 2D                | 758 masses from 300 women | Breast masses        |
| <b>Browne et al.</b>               | 2023 | AI: Can It Make a Difference to the Predictive Value of Ultrasound Breast Biopsy?                                                                                                | Retrospective             | 2D                | 403 cases                 | Breast masses        |
| <b>Chen at al.</b>                 | 2022 | Deep Learning Prediction of Ovarian Malignancy at US Compared with O-RADS and Expert Assessment.                                                                                 | Retrospective             | 2D, color Doppler | 422 women                 | Adnexal masses       |
| <b>Chen et al.</b>                 | 2023 | Improving the Segmentation Accuracy of Ovarian-Tumor Ultrasound Images Using Image Inpainting.                                                                                   | Retrospective             | 2D                | 1,469 images              | Adnexal masses       |

|                            |      |                                                                                                                                                                                                                                                                               |                                    |                   |                                   |                     |
|----------------------------|------|-------------------------------------------------------------------------------------------------------------------------------------------------------------------------------------------------------------------------------------------------------------------------------|------------------------------------|-------------------|-----------------------------------|---------------------|
| <b>Christiansen et al.</b> | 2021 | Ultrasound image analysis using deep neural networks for discriminating between benign and malignant ovarian tumors: comparison with expert subjective assessment.                                                                                                            | Retrospective                      | 2D, color Doppler | 3,077 images from 758 women       | Adnexal masses      |
| <b>Dhombres et al.</b>     | 2017 | Developing a knowledge base to support the annotation of ultrasound images of ectopic pregnancy.                                                                                                                                                                              | Retrospective                      | not specified     | 208 images from 35 cases          | Ectopic pregnancies |
| <b>Dong et al.</b>         | 2021 | One step further into the blackbox: a pilot study of how to build more confidence around an AI-based decision system of breast nodule assessment in 2D ultrasound.                                                                                                            | Retrospective                      | 2D                | 785 images from 367 women         | Breast masses       |
| <b>Gao et al.</b>          | 2022 | Deep learning-enabled pelvic ultrasound images for accurate diagnosis of ovarian cancer in China: a retrospective, multicentre, diagnostic study                                                                                                                              | Retrospective, multi-center        | 2D                | 592,275 images from 107,624 women | Adnexal masses      |
| <b>Hsu et al.</b>          | 2022 | Automatic ovarian tumors recognition system based on ensemble convolutional neural network with ultrasound imaging.                                                                                                                                                           | Prospective                        | 2D                | 1,896 images from 587 women       | Adnexal masses      |
| <b>Huang et al.</b>        | 2022 | Artificial intelligence breast ultrasound and handheld ultrasound in the BI-RADS categorization of breast lesions: A pilot head to head comparison study in screening program.                                                                                                | Prospective                        | 2D videos         | 344 women                         | Breast masses       |
| <b>Huh et al.</b>          | 2023 | Tunable image quality control of 3-D ultrasound using switchable CycleGAN.                                                                                                                                                                                                    | Prospective                        | 3D                | 323 images                        | Image quality       |
| <b>Huo et al.</b>          | 2023 | Artificial intelligence-aided method to detect uterine fibroids in ultrasound images: a retrospective study.                                                                                                                                                                  | Retrospective                      | 2D                | 3,870 images from 667 women       | Uterine fibroids    |
| <b>Jung et al.</b>         | 2022 | Ovarian tumor diagnosis using deep convolutional neural networks and a denoising convolutional autoencoder.                                                                                                                                                                   | Retrospective                      | 2D                | 1,613 images                      | Adnexal masses      |
| <b>Liu et al.</b>          | 2022 | Automatic Measurement of Endometrial Thickness From Transvaginal Ultrasound Images.                                                                                                                                                                                           | Retrospective                      | 2D                | 8,119 images from 467 cases       | Endometrium         |
| <b>Magnuska et al.</b>     | 2022 | Influence of the Computer-Aided Decision Support System Design on Ultrasound-Based Breast Cancer Classification.                                                                                                                                                              | Retrospective                      | 2D                | 505 cases from 497 women          | Breast masses       |
| <b>Maicas at al.</b>       | 2021 | Deep learning to diagnose pouch of Douglas obliteration with ultrasound sliding sign.                                                                                                                                                                                         | Prospective                        | 2D videos         | 749 videos                        | Endometriosis       |
| <b>Martínez Más et al.</b> | 2019 | Evaluation of machine learning methods with Fourier Transform features for classifying ovarian tumors based on ultrasound images.                                                                                                                                             | Retrospective                      | 2D                | 348 images                        | Adnexal masses      |
| <b>Maurice et al.</b>      | 2017 | Towards ontology-based decision support systems for complex ultrasound diagnosis in obstetrics and gynecology.                                                                                                                                                                | Retrospective                      | 2D                | 206 images                        | Ectopic pregnancies |
| <b>Moro et al.</b>         | 2022 | Developing and validating ultrasound-based radiomics models for predicting high-risk endometrial cancer                                                                                                                                                                       | Retrospective, multi-center        | 2D                | 498 women                         | Endometrium         |
| <b>Nero et al.</b>         | 2020 | Germline BRCA 1-2 status prediction through ovarian ultrasound images radiogenomics: a hypothesis generating study (PROBE study).                                                                                                                                             | Retrospective                      | 2D                | 890 images from 255 women         | Adnexal masses      |
| <b>Noor et al.</b>         | 2020 | Three-Dimensional Automated Volume Calculation (Sonography-Based Automated Volume Count) versus Two-Dimensional Manual Ultrasonography for Follicular Tracking and Oocyte Retrieval in Women Undergoing in vitro Fertilization-Embryo Transfer: a Randomized Controlled Trial | Prospective, randomized-controlled | 2D/3D             | 130 women                         | Follicle tracking   |

|                             |      |                                                                                                                                                                                    |                                    |               |                            |                           |
|-----------------------------|------|------------------------------------------------------------------------------------------------------------------------------------------------------------------------------------|------------------------------------|---------------|----------------------------|---------------------------|
| <b>Park et al.</b>          | 2019 | Endometrium segmentation on transvaginal ultrasound image using key-point discriminator.                                                                                           | Retrospective, multi-center        | 2D            | 3,372 images               | Endometrium               |
| <b>Pfob et al.</b>          | 2022 | Intelligent multi-modal shear wave elastography to reduce unnecessary biopsies in breast cancer diagnosis (INSPIRED 002): a retrospective, international, multicentre analysis.    | Retrospective, multi-center        | 2D            | 875 women                  | Breast masses             |
| <b>Pfob et al.</b>          | 2022 | The importance of multi-modal imaging and clinical information for humans and AI-based algorithms to classify breast masses (INSPIRED 003): an international, multicenter analysis | Prospective, multi-center          | 2D            | 1,288 women                | Breast masses             |
| <b>Raimondo et al.</b>      | 2023 | Application of Deep Learning Model in the Sonographic Diagnosis of Uterine Adenomyosis.                                                                                            | Prospective                        | 2D videos     | 100 videos from 100 women  | Endometriosis             |
| <b>Singh et al.</b>         | 2022 | HaTU-Net: Harmonic Attention Network for Automated Ovarian Ultrasound Quantification in Assisted Pregnancy.                                                                        | Retrospective                      | 2D            | 197 women                  | Follicle tracking         |
| <b>Szentimrey et al.</b>    | 2023 | Automated segmentation and measurement of the female pelvic floor from the mid-sagittal plane of 3D ultrasound volumes.                                                            | Retrospective                      | 3D            | 248 images from 135 women  | Pelvic floor              |
| <b>Van den Noort et al.</b> | 2022 | Automatic identification and segmentation of slice of minimal hiatal dimensions in transperineal ultrasound volumes.                                                               | Retrospective                      | 2D            | 367 images from 116 women  | Pelvic floor              |
| <b>Van den Noort et al.</b> | 2019 | Deep learning enables automatic quantitative assessment of puborectalis muscle and urogenital hiatus in plane of minimal hiatal dimensions.                                        | Retrospective                      | 2D from 3D/4D | 1,318 images               | Pelvic floor              |
| <b>Wang et al.</b>          | 2022 | Automatic evaluation of endometrial receptivity in three-dimensional transvaginal ultrasound images based on 3D U-Net segmentation.                                                | Retrospective                      | 3D            | 85 women                   | Endometrium               |
| <b>Williams et al.</b>      | 2021 | Automatic Extraction of Hiatal Dimensions in 3-D Transperineal Pelvic Ultrasound Recordings.                                                                                       | Retrospective                      | 3D            | 73 cases                   | Pelvic floor              |
| <b>Wu et al.</b>            | 2022 | Development and validation of a composite AI model for the diagnosis of levator ani muscle avulsion.                                                                               | Retrospective                      | 3D/4D         | 304 patients               | Pelvic floor              |
| <b>Yang et al.</b>          | 2023 | Automatic Detection of Benign/Malignant Tumor in Breast Ultrasound Images using Optimal Features.                                                                                  | Retrospective                      | 2D            | 1,680 images               | Breast masses             |
| <b>Yang et al.</b>          | 2023 | Real-Time Automatic Assisted Detection of Uterine Fibroid in Ultrasound Images Using a Deep Learning Detector                                                                      | Retrospective                      | 2D            | ns                         | Uterine fibroids          |
| <b>Yu et al.</b>            | 2022 | Diagnosis of Idiopathic Premature Ovarian Failure by Color Doppler Ultrasound under the Intelligent Segmentation Algorithm.                                                        | Retrospective                      | Color Doppler | 120 women                  | Premature Ovarian failure |
| <b>Zhang et al.</b>         | 2022 | Application of Transfer Learning and Feature Fusion Algorithms to Improve the Identification and Prediction Efficiency of Premature Ovarian Failure.                               | Prospective                        | 2D/3D         | 100 women                  | Premature Ovarian failure |
| <b>Zhao et al.</b>          | 2023 | Artificial intelligence diagnosis of intrauterine adhesion by 3D ultrasound imaging: a prospective study.                                                                          | Prospective                        | 3D            | 4,401 women                | Endometrium               |
| <b>Zhu et al.</b>           | 2022 | Ultrasound Evaluation of Pelvic Floor Function after Transumbilical Laparoscopic Single-Site Total Hysterectomy Using Deep Learning Algorithm.                                     | Prospective, randomized-controlled | not specified | 3,619 images from 80 women | Pelvic floor              |
